# Supplementary material
Source: PubMed Central journal article supplement (PMC10317312)
Supplement: NIHMS1888230-supplement-1.pdf [file NIHMS1888230-supplement-1.pdf]

**Supplemental Table 1. Vegetarian Diet Intervention Menus**

|                  | Day 1                  |         | Day 2                           |          |
|------------------|------------------------|---------|---------------------------------|----------|
| Meal             | Food Item              | Portion | Food Item                       | Portion  |
| <b>Breakfast</b> | Grapes                 | 75g     | Peaches                         | 128g     |
|                  | Oatmeal, plain         | 28g     | Granola                         | 72g      |
|                  | Soy milk               | 1 cup   | Strawberry yogurt               | 170g     |
|                  | Soy margarine          | 2 tsp   | Soy milk                        | 1 cup    |
| <b>Snack</b>     | Hazelnuts, dry roasted | 56g     | Almonds, dry roasted            | 56g      |
| <b>Lunch</b>     | Green leaf lettuce     | 36g     | Broccoli, steamed               | 88g      |
|                  | Tomatoes               | 50g     | Wheat hamburger bun             | 1 bun    |
|                  | Italian dressing       | 32g     | Falafel burger                  | 110.5g   |
|                  | Dairy-free cheese      | 28g     | Soy margarine                   | 2 tsp    |
|                  | Corn chowder soup      | 291.4g  | Peaches                         | 128g     |
|                  | Grapes                 | 75g     |                                 |          |
| <b>Snack</b>     | Cantaloupe             | 88.5g   | Pretzels                        | 56.6g    |
| <b>Dinner</b>    | Brown rice             | 250g    | Green leaf lettuce              | 36g      |
|                  | Pinto beans, cooked    | 32g     | Tomatoes, diced                 | 50g      |
|                  | Onion, diced           | 20g     | Italian dressing                | 32g      |
|                  | Corn tortilla chips    | 28g     | Vegetarian "shepherd's pie"     | 292.5g   |
|                  | Salsa                  | 56g     | Soy milk                        | 1 cup    |
|                  | Soy milk               | 1 cup   |                                 |          |
|                  | Grapes                 | 75g     |                                 |          |
|                  | Cantaloupe             | 88.5g   |                                 |          |
|                  | Day 3                  |         | Day 4                           |          |
| Meal             | Food Item              | Portion | Food Item                       | Portion  |
| <b>Breakfast</b> | Grapes                 | 75g     | Wheat bread                     | 2 slices |
|                  | Honey Nut Cheerios     | 51g     | Peanut butter                   | 28g      |
|                  | Soy milk               | 1 cup   | Soy milk                        | 1 cup    |
|                  |                        |         | Soy margarine                   | 1 tsp    |
| <b>Snack</b>     | Peanuts, dry roasted   | 56g     | Almonds, dry roasted            | 56g      |
| <b>Lunch</b>     | Green leaf lettuce     | 36g     | Potato salad                    | 171.g    |
|                  | Tomatoes               | 50g     | Black bean burger               | 120.8g   |
|                  | Italian dressing       | 32g     | Cantaloupe                      | 88.5g    |
|                  | Hamburger bun, wheat   | 1 bun   |                                 |          |
|                  | Soy margarine          | 1 tsp   |                                 |          |
|                  | Lentil burger          | 94.9g   |                                 |          |
|                  | Grapes                 | 75g     |                                 |          |
| <b>Snack</b>     | Pretzels               | 56.6g   | Mandarin oranges                | 70g      |
| <b>Dinner</b>    | Vegetarian Stir-Fry    | 251.1g  | Pasta with garlic and olive oil | 250g     |
|                  | Mandarin oranges       | 70g     | Marinara sauce                  | 128g     |
|                  | Soy milk               | 1 cup   | Green peas, cooked              | 75g      |
|                  | Soy margarine          | 1 tsp   | Soy margarine                   | 2 tsp    |
|                  |                        |         | Soy milk                        | 1 cup    |

**Supplemental Table 2. Significant Changes in Plasma and Urine Metabolites in Women in Response to New Onset Vegetarian Diet.**

**Supplemental Table 2. Significant Changes in Plasma and Urine Metabolites in Women in Response to New Onset Vegetarian Diet**

**Table 2a. Metabolites Increased in Plasma**

| Super Pathway          | Sub Pathway                                      | Biochemical Name                                 | Change in Concentration | p value | q value  |
|------------------------|--------------------------------------------------|--------------------------------------------------|-------------------------|---------|----------|
| Amino Acids            | Glycine, Serine and Threonine Metabolism         | betaine                                          | 1.08                    | 1.4E-03 | 3.5E-03  |
|                        |                                                  | N-acetylglycine                                  | 1.25                    | 0.0180  | 0.0248   |
|                        |                                                  | dimethylglycine                                  | 1.09                    | 0.0121  | 0.0182   |
|                        | Leucine, Isoleucine and Valine Metabolism        | 2,3-dihydroxy-2-methylbutyrate                   | 1.43                    | 2.2E-06 | 1.6E-05  |
|                        | Lysine Metabolism                                | pipecolate                                       | 1.49                    | 1.0E-04 | 5.0E-04  |
|                        | Methionine, Cysteine, SAM and Taurine Metabolism | N-methyltaurine                                  | 1.88                    | 5.8E-05 | 3.00E-04 |
|                        |                                                  | S-methylcysteine                                 | 1.35                    | 4.1E-05 | 2.0E-04  |
|                        |                                                  | S-methylcysteine sulfoxide                       | 1.16                    | 0.0063  | 0.0112   |
|                        | Polyamine Metabolism                             | acisoga                                          | 1.55                    | 3.9E-05 | 2.0E-04  |
|                        |                                                  | N-acetyl-isoputresnine                           | 1.21                    | 0.0002  | 0.0007   |
|                        | Tryptophan Metabolism                            | tryptophan betaine                               | 1.14                    | 2.0E-04 | 6.0E-04  |
|                        |                                                  | indolepropionate                                 | 1.54                    | 1.6E-06 | 1.3E-05  |
|                        | Arginine and Proline Metabolism (Urea Cycle)     | 2-oxoarginine*                                   | 1.48                    | 6.0E-04 | 1.8E-03  |
|                        |                                                  | N-delta-acetylornithine                          | 1.70                    | 6.2E-10 | 1.7E-08  |
|                        |                                                  | homoarginine                                     | 1.09                    | 0.0289  | 0.0341   |
|                        |                                                  | homocitrulline                                   | 1.32                    | 0.0076  | 0.0127   |
|                        |                                                  | N2,N5-diacetylornithine                          | 1.60                    | 0.0023  | 0.0050   |
|                        |                                                  | pro-hydroxy-pro                                  | 1.15                    | 0.0085  | 0.0138   |
| Cofactors and Vitamins | Nicotinate and Nicotinamide Metabolism           | trigonelline (N <sup>1</sup> -methylnicotinate)  | 1.36                    | 6.0E-05 | 3.0E-04  |
|                        | Vitamin A Metabolism                             | beta-cryptoxanthin                               | 1.23                    | 1.7E-05 | 9.4E-05  |
| Lipids                 | Diacylglycerol                                   | oleoyl-linoleoyl-glycerol (18:1/18:2) [1]        | 1.45                    | 1.0E-02 | 1.6E-02  |
|                        |                                                  | palmitoleoyl-linoleoyl-glycerol (16:1/18:2) [1]* | 1.31                    | 6.9E-03 | 1.2E-02  |
|                        |                                                  | oleoyl-linoleoyl-glycerol (18:1/18:2) [2]        | 1.45                    | 1.8E-03 | 4.1E-03  |
|                        | Acyl Carnitine, Medium Chain                     | hexanoylcarnitine (C6)                           | 1.20                    | 0.0076  | 0.0127   |
|                        |                                                  | octanoylcarnitine (C8)                           | 1.15                    | 0.0102  | 0.0160   |
|                        |                                                  | decanoylcarnitine (C10)                          | 1.17                    | 0.0241  | 0.0310   |
|                        | Acyl Carnitine, Monounsaturated                  | cis-4-decenoylcarnitine (C10:1)                  | 1.12                    | 0.0080  | 0.0131   |

|                                        |                                                     |      |         |         |
|----------------------------------------|-----------------------------------------------------|------|---------|---------|
|                                        | myristoleoylcarnitine (C14:1)*                      | 1.27 | 0.0156  | 0.0222  |
|                                        | palmitoleoylcarnitine (C16:1)*                      | 1.21 | 0.0232  | 0.0302  |
|                                        | oleoylcarnitine (C18:1)                             | 1.20 | 0.0011  | 0.0028  |
| Acyl Carnitine, Polyunsaturated        | linoleoylcarnitine (C18:2)*                         | 1.10 | 0.0374  | 0.0409  |
|                                        | arachidonoylcarnitine (C20:4)                       | 1.15 | 0.0289  | 0.0341  |
| Fatty Acid, Amino                      | 2-aminoheptanoate                                   | 1.43 | 6.9E-06 | 4.5E-05 |
| Fatty Acid, Dicarboxylate              | 3-hydroxydodecanedioate*                            | 1.15 | 0.0343  | 0.0382  |
|                                        | dodecadienoate (12:2)*                              | 1.22 | 0.0057  | 0.0106  |
|                                        | tetradecadienedioate (C14:2-DC)*                    | 1.14 | 0.0485  | 0.0506  |
| Long Chain Saturated Fatty Acid        | myristate (14:0)                                    | 1.26 | 0.0300  | 0.0350  |
|                                        | pentadecanoate (15:0)                               | 1.15 | 0.0233  | 0.0302  |
|                                        | palmitate (16:0)                                    | 1.17 | 0.0248  | 0.0312  |
| Long Chain Monounsaturated Fatty Acid  | myristoleate (14:1n5)                               | 1.25 | 0.0383  | 0.0414  |
|                                        | palmitoleate (16:1n7)                               | 1.40 | 1.4E-03 | 3.5E-03 |
|                                        | 10-heptadecenoate (17:1n7)                          | 1.31 | 0.0086  | 0.0138  |
|                                        | oleate/vaccenate (18:1)                             | 1.25 | 0.0065  | 0.0114  |
|                                        | eicosenoate (20:1)                                  | 1.24 | 0.0072  | 0.0123  |
| Long Chain Polyunsaturated Fatty Acids | hexadecadienoate (16:2n6)                           | 1.29 | 0.0077  | 0.0128  |
|                                        | linoleate (18:2n6)                                  | 1.21 | 0.0150  | 0.0217  |
|                                        | dihomo-linoleate (20:2n6)                           | 1.18 | 0.0355  | 0.0393  |
| Medium Chain Fatty Acid                | cis-4-decenoate (10:1n6)*                           | 1.28 | 1.9E-03 | 4.3E-03 |
| Phosphatidylcholine (PC)               | 1-oleoyl-2-docosahexaenoyl-GPC (18:1/22:6)*         | 1.16 | 6.0E-04 | 1.7E-03 |
| Phosphatidylethanolamine (PE)          | 1-oleoyl-2-docosahexaenoyl-GPE (18:1/22:6)*         | 1.31 | 0.0145  | 0.0210  |
| Sphingomyelins                         | sphingomyelin (d18:2/24:2)*                         | 1.08 | 2.6E-03 | 5.6E-03 |
|                                        | sphingomyelin (d18:2/18:1)*                         | 1.08 | 0.0384  | 0.0414  |
|                                        | sphingomyelin (d18:2/23:1)*                         | 1.09 | 0.0139  | 0.0203  |
|                                        | sphingomyelin (d18:1/20:2, d18:2/20:1, d16:1/22:2)* | 1.17 | 0.0016  | 0.0038  |
|                                        | sphingomyelin (d18:2/21:0, d16:2/23:0)*             | 1.07 | 0.0098  | 0.0154  |
|                                        | sphingomyelin (d18:1/22:1, d18:2/22:0, d16:1/24:1)* | 1.03 | 0.0399  | 0.0423  |

|             |                                |                                                     |                         |          |         |
|-------------|--------------------------------|-----------------------------------------------------|-------------------------|----------|---------|
|             |                                | sphingomyelin (d18:1/22:2, d18:2/22:1, d16:1/24:2)* | 1.09                    | 0.0069   | 0.0118  |
|             |                                | sphingomyelin (d18:2/24:1, d18:1/24:2)*             | 1.05                    | 0.0279   | 0.0337  |
|             | Ketone Bodies                  | 3-hydroxybutyrate (BHBA)                            | 1.01                    | 0.0221   | 0.0289  |
|             | Secondary Bile Acid Metabolism | glycocholenate sulfate*                             | 1.07                    | 0.0263   | 0.0325  |
|             |                                | taurocholenate sulfate*                             | 1.31                    | 0.0001   | 0.0005  |
|             | Pregnenolone Steroids          | pregnenediol sulfate (C21H34O5S)*                   | 1.14                    | 0.0005   | 0.0015  |
|             |                                | pregnenediol disulfate (C21H34O8S2)*                | 1.16                    | 0.0115   | 0.0174  |
|             |                                | pregnenetriol sulfate*                              | 1.10                    | 0.0209   | 0.0277  |
|             | Peptides                       | Gamma-glutamyl Amino Acid                           | gamma-glutamylglutamate | 1.15     | 0.0343  |
| Xenobiotics | Benzoate Metabolism            | 4-vinylphenol sulfate                               | 1.54                    | 1.0E-04  | 5.0E-04 |
|             |                                | 4-acetylphenol sulfate                              | 2.75                    | 1.0E-04  | 4.0E-04 |
|             |                                | 4-ethylphenylsulfate                                | 6.46                    | 2.7E-06  | 1.9E-05 |
|             |                                | 4-ethylcatechol sulfate                             | 1.72                    | 0.0202   | 0.0273  |
|             | Food Component/Plant           | N-acetyl-S-allyl-L-cysteine                         | 6.37                    | 7.2E-10  | 1.8E-08 |
|             |                                | alliin                                              | 6.46                    | 1.3E-13  | 1.8E-11 |
|             |                                | N-acetylalliin                                      | 5.34                    | 1.5E-12  | 1.4E-10 |
|             |                                | S-allylcysteine                                     | 6.60                    | 4.7E-12  | 2.7E-10 |
|             |                                | genistein sulfate*                                  | 10.99                   | 6.3E-06  | 4.2E-05 |
|             |                                | equol sulfate                                       | 3.08                    | 0.0318   | 0.0364  |
|             |                                | stachydrine                                         | 1.29                    | 0.0006   | 0.0018  |
|             |                                | 3-hydroxystachydrine*                               | 1.05                    | 0.0004   | 0.0012  |
|             |                                | thymol sulfate                                      | 1.53                    | 5.69E-05 | 0.0003  |
|             |                                | 2-aminophenol sulfate                               | 1.92                    | 7.9E-05  | 3.0E-04 |

**Table 2b. Metabolites Decreased in Plasma**

| Super Pathway | Sub Pathway                              | Biochemical Name     | Change in Concentration | p value | q value |
|---------------|------------------------------------------|----------------------|-------------------------|---------|---------|
| Amino Acids   | Alanine and Aspartate Metabolism         | alanine              | 0.88                    | 3.0E-04 | 9.0E-04 |
|               | Glycine, Serine and Threonine Metabolism | threonine            | 0.84                    | 2.0E-04 | 7.0E-04 |
|               |                                          | Histidine Metabolism | 3-methylhistidine       | 0.07    | 1.0E-15 |
|               | 1-methyl-5-imidazoleacetate              |                      | 0.13                    | 4.9E-11 | 1.6E-09 |
|               | N-acetyl-1-methylhistidine*              |                      | 0.67                    | 5.5E-03 | 1.0E-02 |

|  |                                                  |                               |        |         |         |
|--|--------------------------------------------------|-------------------------------|--------|---------|---------|
|  |                                                  | 1-methylhistidine             | 0.79   | 2.0E-04 | 6.0E-04 |
|  |                                                  | 1-methyl-4-imidazoleacetate   | 0.90   | 0.0362  | 0.0398  |
|  | Leucine, Isoleucine and Valine Metabolism        | isobutyrylglycine             | 0.72   | 3.3E-03 | 6.6E-03 |
|  |                                                  | 1-carboxyethylvaline          | 0.70   | 5.0E-04 | 1.5E-03 |
|  |                                                  | isobutyrylcarnitine (C4)      | 0.71   | 2.0E-04 | 6.0E-04 |
|  |                                                  | tiglylcarnitine (C5:1-DC)     | 0.72   | 1.1E-05 | 6.6E-05 |
|  |                                                  | valine                        | 0.86   | 2.5E-05 | 1.0E-04 |
|  |                                                  | isoleucine                    | 0.92   | 5.0E-04 | 1.4E-03 |
|  |                                                  | leucine                       | 0.92   | 0.0455  | 0.0477  |
|  |                                                  | N-acetylleucine               | 0.86   | 0.0067  | 0.0117  |
|  |                                                  | isovalerylglycine             | 0.64   | 0.0023  | 0.0050  |
|  |                                                  | isovalerylcarnitine (C5)      | 0.83   | 0.0139  | 0.0203  |
|  |                                                  | beta-hydroxyisovalerate       | 0.82   | 0.0050  | 0.0097  |
|  |                                                  | 3-methylglutarylcarnitine (2) | 0.87   | 0.0092  | 0.0146  |
|  |                                                  | alpha-hydroxyisovalerate      | 0.85   | 0.0010  | 0.0027  |
|  |                                                  | Lysine Metabolism             | lysine | 0.84    | 6.0E-08 |
|  | N,N,N-trimethyl-5-aminovalerate                  |                               | 0.92   | 9.0E-04 | 2.4E-03 |
|  | N6,N6,N6-trimethyllysine                         |                               | 0.80   | 0.0004  | 0.0012  |
|  | hydroxy-N6,N6,N6-trimethyllysine*                |                               | 0.88   | 0.0008  | 0.0023  |
|  | 2-aminoadipate                                   |                               | 0.74   | 0.0082  | 0.0134  |
|  | 6-oxopiperidine-2-carboxylate                    |                               | 0.82   | 0.0179  | 0.0248  |
|  | Methionine, Cysteine, SAM and Taurine Metabolism | N-acetylmethionine            | 0.97   | 0.0305  | 0.0353  |
|  |                                                  | methionine sulfoxide          | 0.88   | 0.0035  | 0.0071  |
|  |                                                  | hypotaurine                   | 0.90   | 0.0392  | 0.0419  |
|  |                                                  | taurine                       | 0.93   | 0.0060  | 0.0109  |
|  | Phenylalanine Metabolism                         | N-acetylphenylalanine         | 0.84   | 2.0E-04 | 7.0E-04 |
|  |                                                  | 1-carboxyethylphenylalanine   | 0.79   | 0.0107  | 0.0165  |
|  |                                                  | 4-hydroxyphenylacetate        | 0.73   | 0.0398  | 0.0423  |
|  | Polyamine Metabolism                             | N-acetylputrescine            | 0.95   | 0.0347  | 0.0385  |
|  | Tryptophan Metabolism                            | xanthurenate                  | 0.45   | 1.7E-05 | 9.2E-05 |
|  |                                                  | indole-3-carboxylate          | 0.57   | 1.8E-09 | 3.8E-08 |

|                        |                                                 |                                                    |        |          |          |
|------------------------|-------------------------------------------------|----------------------------------------------------|--------|----------|----------|
|                        |                                                 | 3-indoxyl sulfate                                  | 0.72   | 5.0E-04  | 1.5E-03  |
|                        |                                                 | N-acetyltryptophan                                 | 0.82   | 0.0004   | 0.0012   |
|                        |                                                 | kynurenine                                         | 0.93   | 0.0179   | 0.0248   |
|                        |                                                 | kynurenate                                         | 0.83   | 0.0136   | 0.0202   |
|                        |                                                 | N-formylanthranilic acid                           | 0.84   | 0.0169   | 0.0236   |
|                        |                                                 | picolinate                                         | 0.79   | 0.0209   | 0.0277   |
|                        |                                                 | serotonin                                          | 0.27   | 0.0105   | 0.0162   |
|                        |                                                 | indolelactate                                      | 0.86   | 0.0297   | 0.0348   |
|                        |                                                 | indoleacetate                                      | 0.76   | 1.28E-06 | 1.07E-05 |
|                        |                                                 | indoleacetoylcarnitine*                            | 0.72   | 0.0057   | 0.0106   |
|                        | Tyrosine Metabolism                             | N-acetyltyrosine                                   | 0.74   | 8.4E-05  | 4.0E-04  |
|                        |                                                 | tyrosine                                           | 0.91   | 0.0272   | 0.0333   |
|                        |                                                 | dopamine 3-O-sulfate                               | 0.64   | 0.0027   | 0.0057   |
|                        |                                                 | tyramine O-sulfate                                 | 0.71   | 0.0003   | 0.0009   |
|                        | Arginine and Proline Metabolism<br>(Urea Cycle) | trans-4-hydroxyproline                             | 0.63   | 3.6E-08  | 4.4E-07  |
|                        |                                                 | proline                                            | 0.90   | 1.0E-03  | 2.6E-03  |
|                        |                                                 | urea                                               | 0.85   | 0.0045   | 0.0088   |
|                        |                                                 | N-acetylarginine                                   | 0.89   | 0.0125   | 0.0187   |
|                        |                                                 | N-acetylcitrulline                                 | 0.66   | 0.0024   | 0.0052   |
| N-acetylhomocitrulline |                                                 | 0.70                                               | 0.0249 | 0.0312   |          |
| Cofactors and Vitamins | Nicotinate and Nicotinamide Metabolism          | N1-Methyl-4-pyridone-3-carboxamide                 | 0.82   | 0.0056   | 0.0104   |
|                        | Vitamin A Metabolism                            | carotene diol (3)                                  | 0.89   | 0.0244   | 0.0311   |
| Lipids                 | Androgenic Steroids                             | androstenediol (3beta,17beta) monosulfate (2)      | 0.86   | 9.3E-05  | 4.0E-04  |
|                        |                                                 | 5alpha-androstan-3beta,17beta-diol monosulfate (2) | 0.86   | 2.3E-03  | 5.0E-03  |
|                        |                                                 | androsterone glucuronide                           | 0.91   | 4.0E-04  | 1.2E-03  |
|                        |                                                 | androstenediol (3beta,17beta) disulfate (1)        | 0.92   | 0.0049   | 0.0095   |
|                        |                                                 | epiandrosterone sulfate                            | 0.97   | 0.0155   | 0.0221   |
|                        | Carnitine Metabolism                            | deoxycarnitine                                     | 0.89   | 9.6E-06  | 6.1E-05  |
|                        |                                                 | Carnitine                                          | 0.93   | 0.0036   | 0.0072   |

|                                      |                                                           |      |         |         |
|--------------------------------------|-----------------------------------------------------------|------|---------|---------|
| Dihydrosphingomyelins                | myristoyl dihydrosphingomyelin (d18:0/14:0)*              | 0.78 | 1.6E-08 | 2.5E-07 |
|                                      | palmitoyl dihydrosphingomyelin (d18:0/16:0)*              | 0.94 | 0.0139  | 0.0203  |
|                                      | sphingomyelin (d18:0/20:0, d16:0/22:0)*                   | 0.87 | 0.0212  | 0.0280  |
| Acyl Carnitine, Long Chain Saturated | stearoylcarnitine (C18)                                   | 0.82 | 3.0E-04 | 9.0E-04 |
| Fatty Acid, Amino                    | N-acetyl-2-aminooctanoate*                                | 0.81 | 0.0019  | 0.0045  |
| Fatty Acid, Dicarboxylate            | docosadioate (C22-DC)                                     | 0.52 | 1.3E-05 | 7.6E-05 |
|                                      | 3-carboxy-4-methyl-5-pentyl-2-furanpropionate (3-CMPFP)** | 0.62 | 2.1E-09 | 4.2E-08 |
|                                      | eicosanedioate (C20-DC)                                   | 0.66 | 1.7E-06 | 1.4E-05 |
|                                      | hexadecenedioate (C16:1-DC)*                              | 0.77 | 2.0E-04 | 6.0E-04 |
|                                      | 3-carboxy-4-methyl-5-propyl-2-furanpropanoate (CMPF)      | 0.87 | 7.8E-05 | 3.0E-04 |
|                                      | octadecadienedioate (C18:2-DC)*                           | 0.49 | 0.0026  | 0.0056  |
|                                      | eicosenedioate (C20:1-DC)*                                | 0.81 | 0.0052  | 0.0100  |
| Fatty Acid, Dihydroxy                | 2R,3R-dihydroxybutyrate                                   | 0.74 | 1.7E-08 | 2.6E-07 |
| Lysophospholipid                     | 1-linolenoyl-GPC (18:3)*                                  | 0.65 | 1.4E-05 | 8.1E-05 |
|                                      | 1-oleoyl-GPI (18:1)                                       | 0.79 | 1.6E-03 | 3.8E-03 |
|                                      | 1-oleoyl-GPE (18:1)                                       | 0.87 | 0.0330  | 0.0374  |
|                                      | 1-linoleoyl-GPE (18:2)*                                   | 0.84 | 0.0073  | 0.0123  |
|                                      | 1-arachidonoyl-GPE (20:4n6)*                              | 0.94 | 0.0378  | 0.0412  |
|                                      | 1-palmitoyl-GPG (16:0)*                                   | 0.80 | 0.0089  | 0.0141  |
| Lysoplasmalogen                      | 1-(1-enyl-palmitoyl)-GPE (P-16:0)*                        | 0.76 | 7.8E-05 | 3.0E-04 |
|                                      | 1-(1-enyl-stearoyl)-GPE (P-18:0)*                         | 0.77 | 1.0E-04 | 5.0E-04 |
|                                      | 1-(1-enyl-oleoyl)-GPE (P-18:1)*                           | 0.85 | 0.0109  | 0.0168  |
| Phosphatidylcholine (PC)             | 1-myristoyl-2-palmitoyl-GPC (14:0/16:0)                   | 0.55 | 4.4E-08 | 4.9E-07 |
|                                      | 1-myristoyl-2-arachidonoyl-GPC (14:0/20:4)*               | 0.68 | 2.2E-06 | 1.6E-05 |
|                                      | 1-palmitoyl-2-palmitoleoyl-GPC (16:0/16:1)*               | 0.80 | 1.6E-03 | 3.9E-03 |
|                                      | 1-palmitoyl-2-stearoyl-GPC (16:0/18:0)                    | 0.81 | 4.9E-08 | 5.1E-07 |
|                                      | 1-stearoyl-2-oleoyl-GPC (18:0/18:1)                       | 0.79 | 7.9E-07 | 6.8E-06 |



|                               |                                                        |      |         |         |
|-------------------------------|--------------------------------------------------------|------|---------|---------|
|                               | 1-linoleoyl-2-arachidonoyl-GPC (18:2/20:4n6)*          | 0.85 | 1.3E-05 | 7.5E-05 |
|                               | 1,2-dipalmitoyl-GPC (16:0/16:0)                        | 0.93 | 1.6E-03 | 3.8E-03 |
|                               | 1-stearoyl-2-linoleoyl-GPC (18:0/18:2)*                | 0.91 | 1.2E-05 | 7.5E-05 |
|                               | 1,2-dilinoleoyl-GPC (18:2/18:2)                        | 0.87 | 0.0049  | 0.0096  |
|                               | 1-linoleoyl-2-linolenoyl-GPC (18:2/18:3)*              | 0.73 | 0.0026  | 0.0056  |
|                               | 1-palmitoyl-2-linoleoyl-GPC (16:0/18:2)                | 0.96 | 0.0008  | 0.0021  |
| Phosphatidylethanolamine (PE) | 1-stearoyl-2-oleoyl-GPE (18:0/18:1)                    | 0.70 | 0.0022  | 0.0049  |
| Phosphatidylglycerol (PG)     | 1-stearoyl-2-oleoyl-GPG (18:0/18:1)                    | 0.79 | 2.5E-05 | 1.0E-04 |
| Phosphatidylinositol (PI)     | 1-palmitoyl-2-oleoyl-GPI (16:0/18:1)*                  | 0.83 | 0.0060  | 0.0109  |
|                               | 1-palmitoyl-2-linoleoyl-GPI (16:0/18:2)                | 0.89 | 0.0110  | 0.0168  |
|                               | 1-palmitoyl-2-arachidonoyl-GPI (16:0/20:4)*            | 0.76 | 3.2E-03 | 6.6E-03 |
| Phospholipid Metabolism       | trimethylamine N-oxide                                 | 0.67 | 5.0E-05 | 2.0E-04 |
|                               | glycerophosphoethanolamine                             | 0.82 | 2.0E-04 | 7.0E-04 |
|                               | choline phosphate                                      | 0.85 | 0.0033  | 0.0066  |
|                               | phosphoethanolamine                                    | 0.87 | 0.0282  | 0.0337  |
| Plasmalogen                   | 1-(1-enyl-palmitoyl)-2-linoleoyl-GPE (P-16:0/18:2)*    | 0.49 | 1.4E-11 | 6.9E-10 |
|                               | 1-(1-enyl-palmitoyl)-2-arachidonoyl-GPE (P-16:0/20:4)* | 0.51 | 2.3E-11 | 9.6E-10 |
|                               | 1-(1-enyl-stearoyl)-2-arachidonoyl-GPE (P-18:0/20:4)*  | 0.57 | 4.5E-11 | 1.6E-09 |
|                               | 1-(1-enyl-stearoyl)-2-linoleoyl-GPE (P-18:0/18:2)*     | 0.62 | 1.9E-12 | 1.4E-10 |
|                               | 1-(1-enyl-stearoyl)-2-oleoyl-GPE (P-18:0/18:1)         | 0.63 | 8.8E-10 | 2.0E-08 |
|                               | 1-(1-enyl-palmitoyl)-2-oleoyl-GPE (P-16:0/18:1)*       | 0.72 | 4.2E-08 | 4.9E-07 |
|                               | 1-(1-enyl-palmitoyl)-2-linoleoyl-GPC (P-16:0/18:2)*    | 0.83 | 1.9E-08 | 2.8E-07 |
|                               | 1-(1-enyl-palmitoyl)-2-arachidonoyl-GPC (P-16:0/20:4)* | 0.85 | 3.7E-05 | 2.0E-04 |
|                               | 1-(1-enyl-palmitoyl)-2-palmitoyl-GPC (P-16:0/16:0)*    | 0.93 | 0.0014  | 0.0035  |
| Sphingomyelins                | sphingomyelin (d18:2/14:0, d18:1/14:1)*                | 0.88 | 4.6E-05 | 2.0E-04 |

|             |                                |                                                     |         |          |          |
|-------------|--------------------------------|-----------------------------------------------------|---------|----------|----------|
|             |                                | sphingomyelin (d18:1/14:0, d16:1/16:0)*             | 0.90    | 1.9E-06  | 1.4E-05  |
|             |                                | sphingomyelin (d17:1/14:0, d16:1/15:0)*             | 0.87    | 0.0127   | 0.0188   |
|             |                                | sphingomyelin (d17:1/16:0, d18:1/15:0, d16:1/17:0)* | 0.96    | 0.0399   | 0.0423   |
|             | Primary Bile Acid Metabolism   | chenodeoxycholate                                   | 0.56    | 0.0267   | 0.0328   |
|             | Secondary Bile Acid Metabolism | deoxycholate                                        | 0.64    | 0.0058   | 0.0107   |
|             |                                | glycodeoxycholate                                   | 0.86    | 0.0267   | 0.0328   |
|             |                                | ursodeoxycholate                                    | 0.68    | 0.0248   | 0.0312   |
| Peptides    | Gamma-glutamyl Amino Acid      | gamma-glutamylvaline                                | 0.63    | 2.0E-04  | 6.0E-04  |
|             |                                | gamma-glutamyl-alpha-lysine                         | 0.82    | 1.6E-05  | 9.2E-05  |
|             |                                | gamma-glutamylalanine                               | 0.70    | 0.0390   | 0.0418   |
|             |                                | gamma-glutamylisoleucine*                           | 0.89    | 0.0302   | 0.0352   |
|             |                                | gamma-glutamylleucine                               | 0.90    | 0.0251   | 0.0312   |
|             |                                | gamma-glutamyl-alpha-lysine                         | 0.82    | 1.65E-05 | 9.24E-05 |
|             |                                | gamma-glutamyl-epsilon-lysine                       | 0.80    | 0.0061   | 0.0109   |
|             |                                | gamma-glutamyltyrosine                              | 0.88    | 0.0216   | 0.0284   |
|             |                                | gamma-glutamyl-2-aminobutyrate                      | 0.67    | 0.0064   | 0.0112   |
| Xenobiotics | Benzoate Metabolism            | 4-methylcatechol sulfate                            | 0.34    | 4.1E-06  | 2.8E-05  |
|             |                                | 3-hydroxyhippurate                                  | 0.69    | 0.0274   | 0.0333   |
|             |                                | 3-methyl catechol sulfate (1)                       | 0.27    | 0.0003   | 0.0009   |
|             |                                | propyl 4-hydroxybenzoate sulfate                    | 0.28    | 0.0453   | 0.0476   |
|             |                                | 3-(3-hydroxyphenyl)propionate sulfate               | 0.56    | 0.0053   | 0.0100   |
|             | Food Component/Plant           | 2,3-dihydroxyisovalerate                            | 0.20    | 2.0E-04  | 8.0E-04  |
|             |                                | quinate                                             | 0.21    | 6.8E-08  | 6.1E-07  |
|             |                                | 4-allylphenol sulfate                               | 0.40    | 1.0E-04  | 6.0E-04  |
|             |                                | pyrraline                                           | 0.66    | 2.1E-03  | 4.7E-03  |
|             |                                | 2-piperidinone                                      | 0.65    | 0.0117   | 0.0177   |
|             |                                | erythritol                                          | 0.29    | 0.0404   | 0.0426   |
|             |                                | homostachydrine*                                    | 0.76    | 5.82E-05 | 0.0003   |
|             |                                | N-(2-furoyl)glycine                                 | 0.20    | 0.0236   | 0.0305   |
|             | Xanthine Metabolism            | theobromine                                         | 0.13    | 3.1E-10  | 8.9E-09  |
| caffeine    |                                | 0.23                                                | 3.5E-06 | 2.4E-05  |          |

|  |  |                                            |      |         |         |
|--|--|--------------------------------------------|------|---------|---------|
|  |  | 5-acetylamino-6-amino-3-methyluracil       | 0.21 | 8.2E-09 | 1.4E-07 |
|  |  | 7-methylxanthine                           | 0.14 | 6.6E-08 | 6.1E-07 |
|  |  | 3-methylxanthine                           | 0.15 | 6.2E-09 | 1.1E-07 |
|  |  | 1,7-dimethylurate                          | 0.24 | 2.1E-08 | 2.8E-07 |
|  |  | theophylline                               | 0.27 | 4.5E-08 | 4.9E-07 |
|  |  | 1-methylxanthine                           | 0.34 | 2.5E-08 | 3.2E-07 |
|  |  | 5-acetylamino-6-formylamino-3-methyluracil | 0.16 | 6.3E-08 | 6.1E-07 |
|  |  | paraxanthine                               | 0.43 | 2.0E-08 | 2.8E-07 |
|  |  | 1-methylurate                              | 0.37 | 6.9E-08 | 6.1E-07 |

**Table 2c. Metabolites Increased in Urine**

| Super Pathway | Sub Pathway                              | Biochemical Name                       | Change in Concentration | p value   | q value   |
|---------------|------------------------------------------|----------------------------------------|-------------------------|-----------|-----------|
| Amino Acids   | Alanine and Aspartate Metabolism         | asparagine                             | 1.19                    | 0.0030    | 0.0032    |
|               |                                          | hydroxyasparagine**                    | 1.24                    | 0.0023    | 0.0026    |
|               | Glutamate Metabolism                     | glutamate                              | 1.31                    | 0.0017    | 0.0021    |
|               |                                          | alpha-ketoglutaramate*                 | 1.56                    | 4.814E-05 | 0.0001    |
|               |                                          | gamma-carboxyglutamate                 | 1.43                    | 2.628E-05 | 7.476E-05 |
|               |                                          | N-methyl-GABA                          | 2.00                    | 0.0001    | 0.0002    |
|               | Glutathione Metabolism                   | 2-hydroxybutyrate/2-hydroxyisobutyrate | 1.36                    | 0.0002    | 0.0004    |
|               | Glycine, Serine and Threonine Metabolism | serine                                 | 1.22                    | 0.0008    | 0.0011    |
|               | Guanidino and Acetamido Metabolism       | 4-guanidinobutanoate                   | 1.49                    | 0.0004    | 0.0006    |
|               | Histidine Metabolism                     | imidazole lactate                      | 1.37                    | 5.473E-05 | 0.0001    |
|               |                                          | homocarnosine                          | 1.25                    | 0.0017    | 0.0021    |
|               |                                          | N-acetylcarnosine                      | 1.28                    | 0.0007    | 0.0010    |
|               |                                          | 1-ribosyl-imidazoleacetate*            | 1.57                    | 3.77E-06  | 1.39E-05  |
|               |                                          | hydantoin-5-propionate                 | 1.23                    | 0.0066    | 0.0058    |
|               |                                          | trans-urocanate                        | 1.20                    | 0.0094    | 0.0076    |
|               |                                          | 1-methyl-4-imidazoleacetate            | 1.27                    | 0.0233    | 0.0147    |
|               |                                          | 4-imidazoleacetate                     | 1.26                    | 5.74E-05  | 0.0001    |
|               |                                          | 3-methyl-2-oxoalate                    | 1.40                    | 0.0022    | 0.0025    |

|  |                                                  |                                                  |      |           |           |
|--|--------------------------------------------------|--------------------------------------------------|------|-----------|-----------|
|  | Leucine, Isoleucine and Valine Metabolism        | alpha-hydroxyisovalerate                         | 1.41 | 0.0002    | 0.0005    |
|  |                                                  | N-carbamoylvaline                                | 1.22 | 0.0032    | 0.0034    |
|  |                                                  | isoleucine                                       | 1.15 | 0.0374    | 0.0208    |
|  |                                                  | alpha-hydroxyisocaproate                         | 1.73 | 0.0049    | 0.0046    |
|  |                                                  | 3-hydroxy-2-ethylpropionate                      | 1.28 | 0.0196    | 0.0128    |
|  |                                                  | ethylmalonate                                    | 1.17 | 0.0054    | 0.0050    |
|  |                                                  | methylsuccinate                                  | 1.20 | 0.0064    | 0.0056    |
|  |                                                  | 2,3-dimethylsuccinate                            | 1.39 | 0.0011    | 0.0014    |
|  |                                                  | 3-methyl-2-oxobutyrate                           | 1.29 | 0.0073    | 0.0063    |
|  | Lysine Metabolism                                | N6,N6-dimethyllysine                             | 1.20 | 0.0057    | 0.0051    |
|  |                                                  | 5-(galactosylhydroxy)-L-lysine                   | 1.13 | 0.0442    | 0.0238    |
|  |                                                  | glutaryl carnitine (C5-DC)                       | 1.16 | 0.0403    | 0.0221    |
|  | Methionine, Cysteine, SAM and Taurine Metabolism | 5-methylthioribose**                             | 1.20 | 0.0007    | 0.0010    |
|  |                                                  | S-methylcysteine                                 | 1.57 | 0.0007    | 0.0010    |
|  |                                                  | N-methyltaurine                                  | 2.11 | 1.572E-06 | 6.721E-06 |
|  |                                                  | methionine sulfone                               | 1.23 | 0.0004    | 0.0007    |
|  |                                                  | methionine sulfoxide                             | 1.65 | 0.0001    | 0.0002    |
|  |                                                  | 2,3-dihydroxy-5-methylthio-4-pentenoate (DMTPA)* | 1.37 | 1.15E-05  | 3.70E-05  |
|  |                                                  | S-methylcysteine sulfoxide                       | 1.25 | 0.0027    | 0.0029    |
|  |                                                  | cystine                                          | 1.25 | 0.0031    | 0.0033    |
|  |                                                  | taurine                                          | 1.27 | 0.0452    | 0.0242    |
|  |                                                  | N-acetyltaurine                                  | 1.22 | 0.0003    | 0.0006    |
|  | Phenylalanine Metabolism                         | phenylalanine                                    | 1.15 | 0.0007    | 0.0010    |
|  |                                                  | 2-hydroxyphenylacetate                           | 1.30 | 7.054E-05 | 0.0002    |
|  |                                                  | phenyllactate (PLA)                              | 1.54 | 0.0063    | 0.0055    |
|  | Polyamine Metabolism                             | N-acetyl-isoptureanine*                          | 1.56 | 1.482E-06 | 6.585E-06 |
|  |                                                  | acisoga                                          | 1.51 | 2.124E-07 | 1.373E-06 |
|  |                                                  | spermidine                                       | 1.55 | 0.0017    | 0.0021    |
|  |                                                  | diacetylspermidine*                              | 1.19 | 0.0128    | 0.0095    |
|  |                                                  | 5-methylthioadenosine (MTA)                      | 1.91 | 0.0020    | 0.0023    |
|  |                                                  | 4-acetamidobutanoate                             | 1.17 | 0.0144    | 0.0103    |

|              |                                              |                                              |                       |                       |           |        |
|--------------|----------------------------------------------|----------------------------------------------|-----------------------|-----------------------|-----------|--------|
|              | Tryptophan Metabolism                        | indoleacetate                                | 1.73                  | 0.0002                | 0.0004    |        |
|              |                                              | indolepropionylglycine                       | 1.95                  | 9.333E-08             | 7.11E-07  |        |
|              |                                              | tryptophan                                   | 1.12                  | 0.0321                | 0.0186    |        |
|              |                                              | serotonin                                    | 1.31                  | 0.0028                | 0.0030    |        |
|              |                                              | 5-hydroxyindoleacetate                       | 1.11                  | 0.0347                | 0.0197    |        |
|              |                                              | N-formylanthranilic acid                     | 1.14                  | 0.0300                | 0.0177    |        |
|              |                                              | 3-hydroxykynurenine                          | 1.10                  | 0.0358                | 0.0202    |        |
|              |                                              | picolinate                                   | 1.17                  | 0.0193                | 0.0127    |        |
|              | Tyrosine Metabolism                          | vanillylmandelate (VMA)                      | 1.25                  | 1.579E-05             | 4.953E-05 |        |
|              |                                              | 3-methoxytyrosine                            | 1.21                  | 0.0097                | 0.0078    |        |
|              |                                              | gentisate                                    | 1.45                  | 0.0004                | 0.0007    |        |
|              |                                              | tyramine                                     | 1.27                  | 0.0356                | 0.0201    |        |
|              | Arginine and Proline Metabolism (Urea Cycle) | 2-oxoarginine*                               | 1.63                  | 3.934E-05             | 0.0001    |        |
|              |                                              | symmetric dimethylarginine (SDMA)            | 1.25                  | 0.0024                | 0.0027    |        |
|              |                                              | dimethylarginine (SDMA + ADMA)               | 1.20                  | 0.0008                | 0.0012    |        |
|              |                                              | N-delta-acetylorntithine                     | 1.72                  | 2.849E-11             | 8.682E-10 |        |
|              |                                              | N2,N5-diacetylorntithine                     | 1.78                  | 4.273E-09             | 5.844E-08 |        |
|              |                                              | pro-hydroxy-pro                              | 1.27                  | 0.0006                | 0.0009    |        |
|              |                                              | argininosuccinate                            | 1.38                  | 0.0159                | 0.0110    |        |
|              |                                              | 3-amino-2-piperidone                         | 1.23                  | 0.0037                | 0.0037    |        |
|              |                                              | homocitrulline                               | 1.30                  | 0.0020                | 0.0023    |        |
|              |                                              | 3-hydroxyproline                             | 1.36                  | 0.0037                | 0.0037    |        |
|              |                                              | N,N,N-trimethyl-alanylproline betaine (TMAP) | 1.19                  | 0.0021                | 0.0024    |        |
|              |                                              | argininate*                                  | 1.33                  | 0.0002                | 0.0004    |        |
|              |                                              | N-acetylhomocitrulline                       | 1.33                  | 0.0008                | 0.0012    |        |
|              |                                              | Carbohydrates                                | Aminosugar Metabolism | N-acetylneuraminatate | 1.29      | 0.0002 |
|              | N-acetylglucosaminylasparagine               |                                              |                       | 1.20                  | 0.0020    | 0.0023 |
|              | N-acetylglucosamine/N-acetylgalactosamine    |                                              |                       | 1.23                  | 0.0011    | 0.0014 |
| fucose       | 1.50                                         |                                              |                       | 0.0110                | 0.0084    |        |
| erythronate* | 1.15                                         |                                              |                       | 0.0215                | 0.0139    |        |

|                        |                                              |                                    |           |           |           |
|------------------------|----------------------------------------------|------------------------------------|-----------|-----------|-----------|
|                        | Disaccharides and Oligosaccharides           | raffinose                          | 2.17      | 0.0006    | 0.0010    |
|                        | Pentose Metabolism                           | ribulose/xylulose                  | 1.23      | 0.0002    | 0.0004    |
|                        |                                              | arabinose                          | 1.21      | 0.0308    | 0.0181    |
|                        |                                              | arabitol/xylitol                   | 1.13      | 0.0378    | 0.0209    |
|                        |                                              | ribulonate/xylulonate/lyxonate*    | 1.16      | 0.0128    | 0.0095    |
| Cofactors and Vitamins | Ascorbate and Aldarate Metabolism            | threonate                          | 1.34      | 5.253E-05 | 0.0001    |
|                        |                                              | oxalate (ethanedioate)             | 1.85      | 6.891E-06 | 2.333E-05 |
|                        | Nicotinate and Nicotinamide Metabolism       | nicotinamide                       | 1.42      | 0.0014    | 0.0018    |
|                        |                                              | trigonelline (N'-methylnicotinate) | 1.54      | 5.672E-06 | 1.951E-05 |
|                        |                                              | nicotinate ribonucleoside          | 1.30      | 0.0227    | 0.0144    |
|                        |                                              | nicotinamide riboside              | 1.67      | 0.0001    | 0.0003    |
|                        |                                              | 1-methylnicotinamide               | 1.49      | 0.0011    | 0.0014    |
|                        | Pantothenate and CoA Metabolism              | pantothenate                       | 1.52      | 8.22E-07  | 3.985E-06 |
| Riboflavin Metabolism  | riboflavin (Vitamin B2)                      | 1.81                               | 7.912E-05 | 0.0002    |           |
| Energy                 | TCA Cycle                                    | citrate                            | 1.70      | 1.142E-08 | 1.218E-07 |
|                        |                                              | succinylcarnitine (C4-DC)          | 1.26      | 0.0037    | 0.0037    |
|                        |                                              | succinate                          | 1.37      | 0.0004    | 0.0007    |
|                        |                                              | fumarate                           | 1.62      | 5.583E-05 | 0.0001    |
|                        |                                              | cis-aconitate                      | 1.48      | 0.0144    | 0.0103    |
|                        |                                              | isocitrate                         | 1.53      | 0.0016    | 0.0020    |
|                        |                                              | alpha-ketoglutarate                | 1.38      | 0.0089    | 0.0073    |
|                        |                                              | malate                             | 1.33      | 0.0127    | 0.0094    |
|                        |                                              | trans-aconitate                    | 1.21      | 0.0154    | 0.0109    |
|                        |                                              | 2-methylcitrate                    | 1.16      | 0.0226    | 0.0143    |
| Lipids                 | Fatty Acid Metabolism (Acyl Glutamine)       | isocaproylglutamine                | 1.62      | 0.0004    | 0.0007    |
|                        |                                              | hexanoylglutamine                  | 1.48      | 0.0046    | 0.0044    |
|                        |                                              | 3-heptenoylglutamine               | 1.34      | 0.029     | 0.0174    |
|                        |                                              | N-octanoylglutamine                | 1.40      | 0.0173    | 0.0118    |
|                        |                                              | 2-octenoylglutamine                | 1.52      | 0.0178    | 0.012     |
|                        | Fatty Acid Metabolism (also BCAA Metabolism) | 2-methylmalonylcarnitine (C4-DC)   | 1.15      | 0.0108    | 0.0083    |

|                                                         |                                                      |      |           |           |
|---------------------------------------------------------|------------------------------------------------------|------|-----------|-----------|
| Fatty Acid Metabolism (Acyl Carnitine, Monounsaturated) | myristoleoylcarnitine (C14:1)*                       | 1.70 | 0.0025    | 0.0028    |
|                                                         | 5-dodecenoylcarnitine (C12:1)                        | 1.28 | 0.0103    | 0.0081    |
| Fatty Acid Metabolism(Acyl Glycine)                     | hexanoylglycine                                      | 1.36 | 0.0049    | 0.0046    |
|                                                         | trans-2-hexenoylglycine                              | 1.59 | 0.0010    | 0.0014    |
|                                                         | isocaproylglycine                                    | 1.27 | 0.0170    | 0.0116    |
|                                                         | N-octanoylglycine                                    | 1.43 | 0.0296    | 0.0176    |
|                                                         | suberylglycine                                       | 1.44 | 0.0055    | 0.0051    |
|                                                         | 2-butenoylglycine                                    | 1.25 | 0.0390    | 0.0215    |
|                                                         | 3-hydroxybutyrylglycine**                            | 1.20 | 0.0316    | 0.0185    |
| Fatty Acid Synthesis                                    | malonate                                             | 1.59 | 0.0011    | 0.0014    |
|                                                         | malonylcarnitine                                     | 1.53 | 0.0048    | 0.0046    |
| Fatty Acid, Dicarboxylate                               | 3-carboxy-4-methyl-5-propyl-2-furanpropanoate (CMPF) | 1.35 | 7.814E-06 | 2.605E-05 |
|                                                         | 3-methylglutarate/2-methylglutarate                  | 1.30 | 0.0141    | 0.0103    |
|                                                         | 2-hydroxyglutarate                                   | 1.17 | 0.0052    | 0.0048    |
|                                                         | maleate                                              | 1.20 | 0.0254    | 0.0155    |
|                                                         | sebacate (C10-DC)                                    | 1.87 | 0.0458    | 0.0244    |
|                                                         | 3-hydroxydodecanedioate*                             | 1.33 | 0.0050    | 0.0047    |
| Fatty Acid, Monohydroxy                                 | 3-hydroxyhexanoate                                   | 1.91 | 9.242E-05 | 0.0002    |
|                                                         | 3-hydroxysebacate                                    | 1.31 | 0.0062    | 0.0055    |
| Galactosyl PG                                           | galactosylglycerol                                   | 1.56 | 0.0008    | 0.0012    |
| Inositol Metabolism                                     | scyllo-inositol                                      | 1.29 | 0.0004    | 0.0007    |
|                                                         | myo-inositol                                         | 1.20 | 0.0210    | 0.0137    |
| Pregnenolone Steroids                                   | 21-hydroxypregnenolone disulfate                     | 1.38 | 6.742E-05 | 0.0002    |
|                                                         | pregnenediol disulfate (C21H34O8S2)*                 | 1.63 | 5.162E-08 | 4.788E-07 |
|                                                         | pregnenetriol sulfate*                               | 2.12 | 9.32E-08  | 7.11E-07  |
|                                                         | pregnenetriol disulfate*                             | 1.49 | 0.0002    | 0.0004    |
|                                                         | 17alpha-hydroxypregnanolone glucuronide              | 1.39 | 0.0101    | 0.0080    |
| Progesterin Steroids                                    | pregnanediol-3-glucuronide                           | 1.90 | 0.0006    | 0.0009    |
|                                                         | 5alpha-pregnan-3beta,20alpha-diol disulfate          | 1.53 | 0.0157    | 0.0110    |
|                                                         | 5alpha-pregnan-diol disulfate                        | 2.24 | 0.0148    | 0.0105    |

|             |                                                         |                                             |      |           |           |
|-------------|---------------------------------------------------------|---------------------------------------------|------|-----------|-----------|
|             | Primary Bile Acid Metabolism                            | glycochenodeoxycholate 3-sulfate            | 1.21 | 0.0295    | 0.0176    |
|             | Secondary Bile Acid Metabolism                          | lithocholate sulfate (1)                    | 1.45 | 0.0024    | 0.0027    |
|             |                                                         | glycolithocholate sulfate*                  | 1.58 | 0.0002    | 0.0003    |
|             |                                                         | tauroolithocholate 3-sulfate                | 1.61 | 0.0006    | 0.0009    |
|             |                                                         | glycocholenate sulfate*                     | 1.47 | 4.101E-06 | 1.483E-05 |
|             |                                                         | taurocholenate sulfate*                     | 1.67 | 3.821E-07 | 2.264E-06 |
|             |                                                         | taurochenodeoxycholic acid 3-sulfate        | 1.19 | 0.0348    | 0.0198    |
| Nucleotides | Purine Metabolism,<br>(Hypo)Xanthine/Inosine containing | inosine                                     | 1.26 | 4.557E-05 | 0.0001    |
|             |                                                         | allantoin                                   | 1.64 | 1.113E-06 | 5.052E-06 |
|             |                                                         | hypoxanthine                                | 1.34 | 0.0044    | 0.0043    |
|             |                                                         | xanthosine                                  | 1.23 | 0.0040    | 0.0040    |
|             |                                                         | N1-methylinosine                            | 1.15 | 0.0105    | 0.0082    |
|             |                                                         | urate                                       | 1.19 | 0.0043    | 0.0043    |
|             |                                                         | uric acid ribonucleoside*                   | 1.15 | 0.0471    | 0.0250    |
|             |                                                         | 1-methylhypoxanthine                        | 1.44 | 0.0015    | 0.0019    |
|             | Purine Metabolism, Adenine containing                   | N1-methyladenosine                          | 1.19 | 0.0019    | 0.0023    |
|             |                                                         | N6-carbamoylthreonyladenosine               | 1.38 | 3.852E-05 | 0.0001    |
|             |                                                         | adenosine 3',5'-cyclic monophosphate (cAMP) | 1.19 | 0.0045    | 0.0044    |
|             |                                                         | adenine                                     | 1.77 | 0.0275    | 0.0166    |
|             |                                                         | 1-methyladenine                             | 1.37 | 0.0075    | 0.0064    |
|             |                                                         | N6-methyladenosine                          | 2.08 | 0.0083    | 0.0070    |
|             |                                                         | N6-succinyladenosine                        | 1.21 | 0.0028    | 0.0030    |
|             | Purine Metabolism, Guanine containing                   | N2,N2-dimethylguanosine                     | 1.27 | 0.0013    | 0.0016    |
|             |                                                         | guanosine                                   | 1.22 | 0.0165    | 0.0113    |
|             |                                                         | N2-methylguanosine                          | 1.19 | 0.0132    | 0.0097    |
|             | Pyrimidine Metabolism, Orotate containing               | orotate                                     | 1.38 | 0.0002    | 0.0003    |
|             | Pyrimidine Metabolism, Uracil containing                | pseudouridine                               | 1.51 | 1.375E-07 | 9.779E-07 |
|             |                                                         | 5,6-dihydrouridine                          | 1.32 | 2.265E-05 | 6.528E-05 |
|             |                                                         | 3-ureidopropionate                          | 1.31 | 3.655E-06 | 1.368E-05 |
|             |                                                         | uridine                                     | 1.18 | 0.0097    | 0.0078    |



|                                   |                                   |                                     |                      |                        |           |           |
|-----------------------------------|-----------------------------------|-------------------------------------|----------------------|------------------------|-----------|-----------|
|                                   |                                   | uracil                              | 1.15                 | 0.0129                 | 0.0095    |           |
|                                   |                                   | pseudouridine                       | 1.51                 | 1.38E-07               | 9.78E-07  |           |
|                                   |                                   | N3-methyluridine                    | 2.19                 | 0.0320                 | 0.0186    |           |
|                                   |                                   | 5,6-dihydrouracil                   | 1.20                 | 0.0111                 | 0.0085    |           |
|                                   |                                   | 4-ureidobutyrate                    | 1.16                 | 0.0026                 | 0.0029    |           |
|                                   |                                   | 3-(3-amino-3-carboxypropyl)uridine* | 1.16                 | 0.0095                 | 0.0076    |           |
| Partially Characterized Molecules | Partially Characterized Molecules | glucuronide of C8H14O2 (5)*         | 2.28                 | 0.0003                 | 0.0006    |           |
|                                   |                                   | glucuronide of C10H14O2 (2)*        | 2.25                 | 6.197E-07              | 3.155E-06 |           |
|                                   |                                   | glucuronide of C12H20O3 (3)*        | 1.49                 | 0.0041                 | 0.0041    |           |
|                                   |                                   | glutamine conjugate of C8H12O4 (2)* | 2.00                 | 0.0036                 | 0.0037    |           |
|                                   |                                   | glycine conjugate of C10H12O2*      | 1.19                 | 0.0455                 | 0.0243    |           |
| Peptides                          | Dipeptide Derivative              | isoleucylhydroxyproline*            | 1.30                 | 2.001E-05              | 5.846E-05 |           |
|                                   |                                   | leucylhydroxyproline*               | 1.33                 | 8.8E-07                | 4.15E-06  |           |
| Xenobiotics                       | Benzoate Metabolism               | 4-hydroxybenzoate                   | 1.39                 | 0.0001                 | 0.0003    |           |
|                                   |                                   | 4-acetylphenol sulfate              | 3.14                 | 8.95E-07               | 4.15E-06  |           |
|                                   |                                   | 4-ethylphenylsulfate                | 7.50                 | 2.399E-07              | 1.505E-06 |           |
|                                   |                                   | 4-ethylphenol glucuronide           | 6.92                 | 4.475E-07              | 2.58E-06  |           |
|                                   |                                   | 4-vinylphenol sulfate               | 1.93                 | 1.688E-06              | 7.061E-06 |           |
|                                   |                                   | 4-hydroxyhippurate                  | 1.41                 | 0.0013                 | 0.0016    |           |
|                                   |                                   | mandelate                           | 1.73                 | 0.0136                 | 0.0100    |           |
|                                   |                                   | benzoate                            | 1.27                 | 0.0434                 | 0.0234    |           |
|                                   |                                   | catechol sulfate                    | 1.14                 | 0.0361                 | 0.0203    |           |
|                                   |                                   | guaiacol sulfate                    | 1.09                 | 0.0411                 | 0.0223    |           |
|                                   |                                   | 4-ethylcatechol sulfate             | 1.95                 | 0.0002                 | 0.0003    |           |
|                                   |                                   | 3,5-dihydroxybenzoic acid           | 2.16                 | 1.575E-06              | 6.721E-06 |           |
|                                   |                                   | Food Component/Plant                | Food Component/Plant | genistein glucuronide* | 47.79     | 2.091E-06 |
|                                   | vanillate                         |                                     |                      | 1.68                   | 3.039E-05 | 8.53E-05  |
|                                   | 3-formylindole                    |                                     |                      | 1.56                   | 4.997E-05 | 0.0001    |
|                                   | alliin                            |                                     |                      | 5.50                   | 4.944E-12 | 2.637E-10 |
|                                   | N-acetylalliin                    |                                     |                      | 5.62                   | 6.729E-12 | 2.871E-10 |
|                                   | daidzein 7-O-glucuronide          |                                     |                      | 20.11                  | 7.969E-06 | 2.615E-05 |

|  |                                                      |       |           |           |
|--|------------------------------------------------------|-------|-----------|-----------|
|  | genistein sulfate*                                   | 20.59 | 1.769E-05 | 5.39E-05  |
|  | dihydroferulate                                      | 1.44  | 0.0003    | 0.0006    |
|  | naringenin 7-glucuronide                             | 4.21  | 2.735E-09 | 4.488E-08 |
|  | sulfate of piperine metabolite<br>C18H21NO3 (1)*     | 1.44  | 0.0001    | 0.0003    |
|  | N-acetyl-S-allyl-L-cysteine                          | 6.96  | 7.64E-13  | 5.431E-11 |
|  | daidzein sulfate (1)                                 | 17.09 | 1.996E-05 | 5.846E-05 |
|  | sucralose                                            | 2.61  | 0.0336    | 0.0193    |
|  | genistein                                            | 8.31  | 0.0008    | 0.0011    |
|  | genistein glucuronide*                               | 47.79 | 2.09E-06  | 8.58E-06  |
|  | dihydrocaffeate sulfate (2)                          | 1.24  | 0.0117    | 0.0089    |
|  | cryptochlorogenic acid                               | 2.20  | 0.0006    | 0.0009    |
|  | dihydroferulic acid sulfate                          | 1.24  | 0.0089    | 0.0073    |
|  | daidzein                                             | 10.67 | 0.0003    | 0.0005    |
|  | naringenin                                           | 1.92  | 0.0012    | 0.0016    |
|  | sulfate of piperine metabolite<br>C16H19NO4 (1)*     | 2.08  | 0.0016    | 0.0019    |
|  | syringic acid                                        | 2.47  | 0.0181    | 0.0122    |
|  | thymol sulfate                                       | 1.76  | 3.19E-06  | 1.24E-05  |
|  | 2-aminophenol sulfate                                | 2.07  | 9.54E-05  | 0.0002    |
|  | cinnamoylglycine                                     | 1.16  | 0.0236    | 0.0148    |
|  | ferulylglycine (1)                                   | 1.31  | 0.0224    | 0.0143    |
|  | ferulylglycine (2)                                   | 1.11  | 0.0159    | 0.0110    |
|  | fucitol                                              | 1.14  | 0.0195    | 0.0128    |
|  | homocitrate                                          | 1.46  | 0.0001    | 0.0003    |
|  | mannonate*                                           | 1.18  | 0.0122    | 0.0092    |
|  | methyl indole-3-acetate                              | 1.78  | 0.0105    | 0.0082    |
|  | glucuronide of piperine metabolite<br>C17H21NO3 (1)* | 1.28  | 0.0221    | 0.0142    |
|  | glucuronide of piperine metabolite<br>C17H21NO3 (5)* | 1.38  | 0.0220    | 0.0142    |
|  | glucuronide of piperine metabolite<br>C17H21NO3 (6)* | 1.49  | 0.0061    | 0.0054    |

|  |  |                                                  |       |          |          |
|--|--|--------------------------------------------------|-------|----------|----------|
|  |  | sulfate of piperine metabolite<br>C15H17NO3 (1)* | 1.61  | 0.0015   | 0.0019   |
|  |  | sulfate of piperine metabolite<br>C15H17NO3 (2)* | 1.72  | 0.0004   | 0.0007   |
|  |  | sulfate of piperine metabolite<br>C16H19NO3 (1)* | 1.25  | 0.0155   | 0.0109   |
|  |  | sulfate of piperine metabolite<br>C16H19NO3 (2)* | 1.19  | 0.0384   | 0.0212   |
|  |  | sulfate of piperine metabolite<br>C16H19NO3 (3)* | 1.26  | 0.0063   | 0.0055   |
|  |  | sulfate of piperine metabolite<br>C16H19NO4 (4)* | 1.29  | 0.0072   | 0.0062   |
|  |  | sulfate of piperine metabolite<br>C18H21NO3 (3)* | 1.33  | 0.0005   | 0.0008   |
|  |  | stachydrine                                      | 1.21  | 0.0005   | 0.0007   |
|  |  | 3-hydroxystachydrine*                            | 1.10  | 3.46E-05 | 9.45E-05 |
|  |  | daidzein sulfate (2)                             | 28.32 | 3.31E-05 | 9.16E-05 |
|  |  | tartrate (hydroxymalonnate)                      | 1.33  | 0.0252   | 0.0154   |

**Table 2d. Metabolites Decreased in Urine**

| Super Pathway | Sub Pathway                               | Biochemical Name            | Change in Concentration | p value   | q value  |
|---------------|-------------------------------------------|-----------------------------|-------------------------|-----------|----------|
| Amino Acid    | Histidine Metabolism                      | 3-methylhistidine           | 0.07                    | 0         | 1.3E-14  |
|               |                                           | N-acetylhistidine           | 0.58                    | 3.27E-07  | 2.00E-06 |
|               |                                           | N-acetyl-3-methylhistidine* | 0.07                    | 1E-15     | 6.4E-14  |
|               |                                           | anserine                    | 0.11                    | 8.546E-08 | 7.11E-07 |
|               |                                           | 1-methyl-5-imidazoleacetate | 0.17                    | 1.111E-11 | 3.95E-10 |
|               |                                           | N-acetyl-1-methylhistidine* | 0.85                    | 0.0248    | 0.0152   |
|               |                                           | 1-methylhistidine           | 0.84                    | 0.0259    | 0.0157   |
|               | Leucine, Isoleucine and Valine Metabolism | isovalerylglycine           | 0.69                    | 0.0002    | 0.0003   |
|               |                                           | isovalerylcarnitine (C5)    | 0.50                    | 0.0004    | 0.0007   |
|               |                                           | isobutyrylcarnitine (C4)    | 0.73                    | 0.0001    | 0.0003   |
|               |                                           | tiglylcarnitine (C5:1-DC)   | 0.81                    | 0.0076    | 0.0065   |
|               |                                           | isobutyrylglycine           | 0.72                    | 0.0003    | 0.0006   |
|               |                                           | 1-carboxyethylvaline        | 0.82                    | 0.0277    | 0.0166   |
|               |                                           | 1-carboxyethylleucine       | 0.84                    | 0.0416    | 0.0226   |

|                                   |                                              |                                   |      |           |           |
|-----------------------------------|----------------------------------------------|-----------------------------------|------|-----------|-----------|
|                                   |                                              | beta-hydroxyisovaleroylcarnitine  | 0.85 | 0.0121    | 0.0092    |
|                                   |                                              | N-acetylisoleucine                | 0.87 | 0.0486    | 0.0257    |
|                                   |                                              | 1-carboxyethylisoleucine          | 0.82 | 0.0307    | 0.0181    |
|                                   |                                              | 2-methylbutyrylcarnitine (C5)     | 0.65 | 0.0021    | 0.0024    |
|                                   | Lysine Metabolism                            | N,N,N-trimethyl-5-aminovalerate   | 0.55 | 0.0094    | 0.0076    |
|                                   |                                              | 2-aminoadipate                    | 0.80 | 0.0328    | 0.019     |
|                                   | Phenylalanine Metabolism                     | phenethylamine                    | 0.82 | 0.0012    | 0.0015    |
|                                   | Tryptophan Metabolism                        | tryptamine                        | 0.69 | 0.0068    | 0.0060    |
|                                   |                                              | xanthurenate                      | 0.78 | 0.0234    | 0.0147    |
|                                   |                                              | 8-methoxykynurenate               | 0.84 | 0.0168    | 0.0115    |
|                                   |                                              | indoleacetyl carnitine*           | 0.39 | 0.0001    | 0.0003    |
|                                   | Tyrosine Metabolism                          | 3-hydroxyphenylacetatoylcarnitine | 0.21 | 0.0010    | 0.0013    |
|                                   |                                              | 5-hydroxymethyl-2-furoic acid     | 0.18 | 0.0028    | 0.0030    |
|                                   |                                              | N-acetyltyrosine                  | 0.81 | 0.0339    | 0.0195    |
|                                   |                                              | 4-hydroxyphenylacetatoylcarnitine | 0.67 | 0.0036    | 0.0037    |
|                                   |                                              | tyramine O-sulfate                | 0.77 | 0.0095    | 0.0076    |
|                                   | Arginine and Proline Metabolism (Urea Cycle) | methylurea                        | 0.74 | 0.0198    | 0.0129    |
| Cofactors and Vitamins            | Nicotinate and Nicotinamide Metabolism       | nicotinamide N-oxide              | 0.71 | 0.0038    | 0.0038    |
| Lipid                             | Fatty Acid Metabolism (also BCAA Metabolism) | propionylcarnitine (C3)           | 0.40 | 0.0001    | 0.0002    |
|                                   | Fatty Acid, Dicarboxylate                    | 2-hydroxyadipate                  | 0.82 | 0.0245    | 0.0151    |
| Partially Characterized Molecules | Partially Characterized Molecules            | glucuronide of C10H14O2 (1)*      | 0.60 | 5.019E-07 | 2.818E-06 |
|                                   |                                              | glucuronide of C8H14O2 (1)*       | 0.59 | 0.0056    | 0.0051    |
|                                   |                                              | glucuronide of C8H16O2 (2)*       | 0.42 | 0.0056    | 0.0051    |
|                                   |                                              | glucuronide of C19H28O4 (2)*      | 0.14 | 0.0006    | 0.0009    |
|                                   |                                              | glucuronide of C9H10O4 (1)*       | 0.71 | 0.0347    | 0.0197    |
|                                   |                                              | glucuronide of C12H22O3 (1)*      | 0.31 | 0.0225    | 0.0143    |
|                                   |                                              | glucuronide of C14H22O4 (2)*      | 0.66 | 0.0009    | 0.0012    |
|                                   |                                              | glucuronide of C14H22O4 (3)*      | 0.68 | 0.0069    | 0.0060    |
|                                   |                                              | glucuronide of C19H28O4 (1)*      | 0.67 | 0.0035    | 0.0036    |
|                                   |                                              | glycine conjugate of C9H16O2*     | 0.76 | 0.0016    | 0.0020    |

|                   |                      |                                       |           |           |           |
|-------------------|----------------------|---------------------------------------|-----------|-----------|-----------|
| Peptide           | Dipeptide            | cyclo(gly-pro)                        | 0.48      | 0.0009    | 0.0012    |
|                   |                      | cyclo(pro-sulfo-tyr)*                 | 0.74      | 0.0052    | 0.0048    |
| Xenobiotics       | Benzoate Metabolism  | 4-methylguaiacol sulfate              | 0.33      | 0.0014    | 0.0017    |
|                   |                      | 4-methylcatechol sulfate              | 0.56      | 0.0022    | 0.0026    |
|                   |                      | 2-ethylphenylsulfate                  | 0.46      | 0.0002    | 0.0004    |
|                   |                      | 3-methyl catechol sulfate (1)         | 0.44      | 0.0221    | 0.0142    |
|                   |                      | 3-methyl catechol sulfate (2)         | 0.32      | 0.0102    | 0.0080    |
|                   |                      | o-cresol sulfate                      | 0.72      | 0.0445    | 0.0239    |
|                   |                      | 3-(3-hydroxyphenyl)propionate sulfate | 0.66      | 0.0346    | 0.0197    |
|                   | Food Component/Plant | 2,3-dihydroxyisovalerate              | 0.23      | 0.0011    | 0.0015    |
|                   |                      | 2,8-quinolinediol sulfate             | 0.28      | 7.608E-09 | 9.016E-08 |
|                   |                      | 5-hydroxymethyl-2-furoylcarnitine*    | 0.32      | 0.0003    | 0.0005    |
|                   |                      | quinate                               | 0.32      | 3.274E-06 | 1.247E-05 |
|                   |                      | (2,4 or 2,5)-dimethylphenol sulfate   | 0.51      | 0.0004    | 0.0007    |
|                   |                      | enterolactone                         | 0.31      | 0.0030    | 0.0032    |
|                   |                      | 3-ethylcatechol sulfate (1)           | 0.35      | 0.0405    | 0.0221    |
|                   |                      | 4-allylphenol sulfate                 | 0.53      | 0.0145    | 0.0104    |
|                   |                      | tartarate                             | 0.26      | 0.0495    | 0.0261    |
|                   |                      | 1,6-anhydroglucose                    | 0.31      | 0.0184    | 0.0123    |
|                   |                      | 3-hydroxyindolin-2-one                | 0.78      | 0.0240    | 0.0149    |
|                   |                      | beta-guanidinopropanoate              | 0.21      | 0.0005    | 0.0009    |
|                   |                      | homostachydrine*                      | 0.71      | 0.0137    | 0.0100    |
|                   |                      | 2-furoylcarnitine                     | 0.49      | 0.0083    | 0.0070    |
|                   |                      | 4-vinylguaiacol sulfate               | 0.14      | 0.0265    | 0.0160    |
|                   |                      | Xanthine Metabolism                   | caffeine  | 0.18      | 6.74E-05  |
|                   | paraxanthine         |                                       | 0.33      | 5.702E-07 | 3.041E-06 |
|                   | theobromine          |                                       | 0.11      | 1.764E-09 | 3.762E-08 |
|                   | theophylline         |                                       | 0.26      | 7.442E-07 | 3.692E-06 |
|                   | 1-methylurate        |                                       | 0.47      | 1.606E-05 | 4.966E-05 |
| 7-methylurate     | 0.17                 |                                       | 1.793E-07 | 1.209E-06 |           |
| 1,3-dimethylurate | 0.25                 |                                       | 6.211E-07 | 3.155E-06 |           |

|  |  |                                            |      |           |           |
|--|--|--------------------------------------------|------|-----------|-----------|
|  |  | 1,7-dimethylurate                          | 0.26 | 2.846E-08 | 2.76E-07  |
|  |  | 3,7-dimethylurate                          | 0.15 | 1.458E-09 | 3.455E-08 |
|  |  | 1,3,7-trimethylurate                       | 0.28 | 1.812E-08 | 1.841E-07 |
|  |  | 1-methylxanthine                           | 0.35 | 1.814E-07 | 1.209E-06 |
|  |  | 3-methylxanthine                           | 0.15 | 2.135E-09 | 4.14E-08  |
|  |  | 7-methylxanthine                           | 0.15 | 4.157E-09 | 5.844E-08 |
|  |  | 5-acetylamino-6-amino-3-methyluracil       | 0.27 | 8.899E-08 | 7.11E-07  |
|  |  | 5-acetylamino-6-formylamino-3-methyluracil | 0.13 | 4.707E-09 | 5.906E-08 |
|  |  | 3-methylurate*                             | 0.15 | 2.473E-09 | 4.397E-08 |

**Supplemental Figure: Results of Principle Component Analysis Show Plasma (1a) and Urine (1b) Samples Segregate by Type of Diet Exposure.**

**Supplemental Figure. Results of Principle Component Analysis Show Plasma (1a) and Urine (1b) Samples Segregate by Type of Diet Exposure.**

**1a. Plasma**

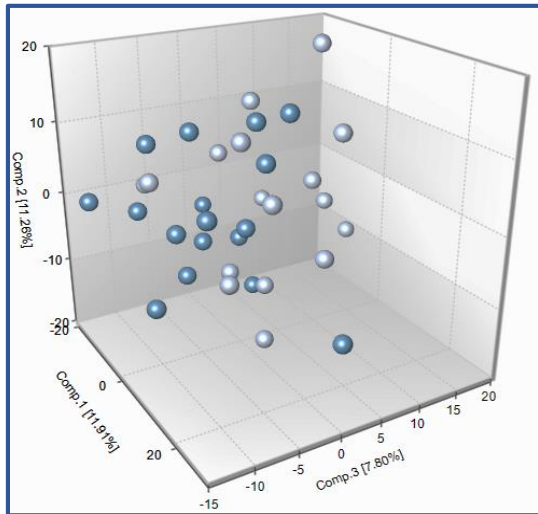

**1b. Urine**

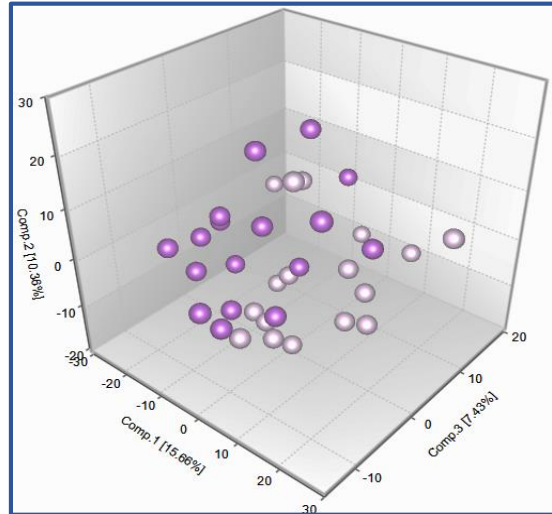

\*Dark blue and dark purple circles represent samples after 4 days of vegetarian diet (study day 6), light blue and light purple circles represent samples from habitual (omnivorous) diet (study day 1).
